# Supplementary material for: MOR promotes epithelial-mesenchymal transition and proliferation via PI3K/AKT signaling pathway in human colorectal cancer: MOR promotes EMT and proliferation
Source: PubMed Central journal article supplement (PMC10157524; doi:10.3724/abbs.2022114), 2022-08-18
Supplement: 8-22314supplementary_Figure_S1.pdf [file 8-22314supplementary_Figure_S1.pdf]

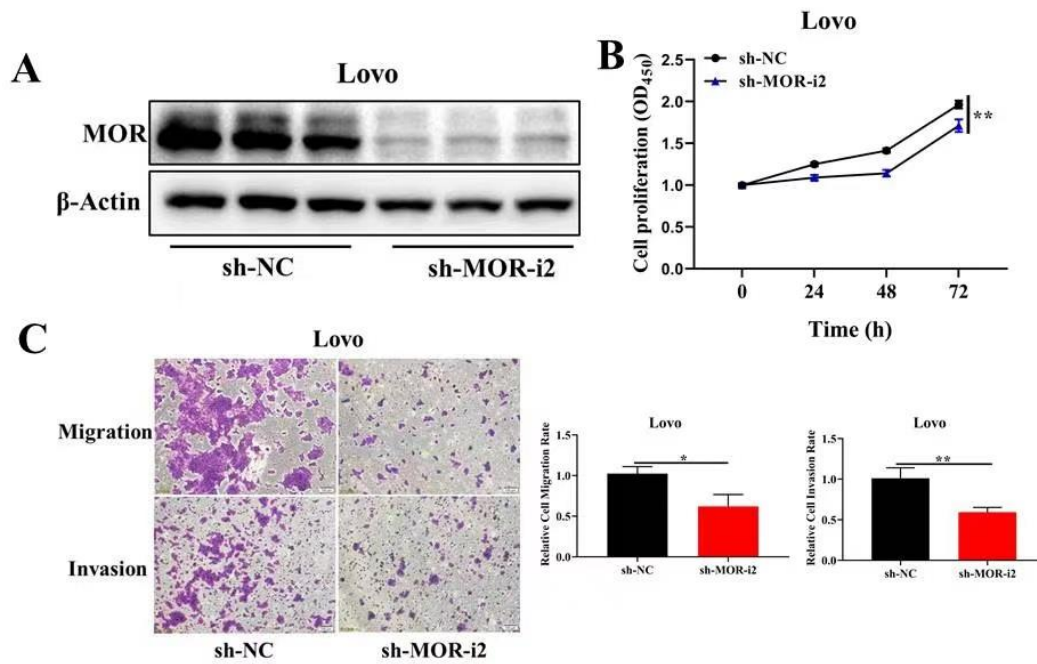

**Supplementary Figure S1. Role of MOR in CRC proliferation, migration, and invasion in LoVo cells** (A) Representative western blots showing the knockdown of *MOR* in LoVo cells by transient transfection with sh-MOR. (B) Cell proliferation assay and the statistical results. (C) Migration and invasion assay and statistical results. \* $P < 0.05$ , \*\* $P < 0.01$ .
